# Supplementary material for: Using machine learning to study the effect of medication adherence in Opioid Use Disorder
Source: PubMed Central journal article supplement (PMC9754174; doi:10.1371/journal.pone.0278988), 2022-12-15
Supplement: pone.0278988.s002.pdf [file pone.0278988.s002.pdf]

## S2 Appendix: Description of the data broken down by medication adherence

|                          |          | Missing | Overall      | PDC < 0.8    | PDC ≥ 0.8    | P-Value |
|--------------------------|----------|---------|--------------|--------------|--------------|---------|
| n                        |          |         | 26685        | 11564        | 15121        |         |
| indv_GENCD_RF, n (%)     | F        | 0       | 15076 (56.5) | 6322 (54.7)  | 8754 (57.9)  | <0.001  |
|                          | M        |         | 11609 (43.5) | 5242 (45.3)  | 6367 (42.1)  |         |
| age_cat, n (%)           | 16-29    | 0       | 5240 (19.6)  | 2495 (21.6)  | 2745 (18.2)  | <0.001  |
|                          | 30-39    |         | 11774 (44.1) | 5069 (43.8)  | 6705 (44.3)  |         |
|                          | 40-49    |         | 6031 (22.6)  | 2527 (21.9)  | 3504 (23.2)  |         |
|                          | 50-59    |         | 2935 (11.0)  | 1226 (10.6)  | 1709 (11.3)  |         |
|                          | above_60 |         | 705 (2.6)    | 247 (2.1)    | 458 (3.0)    |         |
| Prior_CHF, n (%)         | False    | 0       | 26370 (98.8) | 11426 (98.8) | 14944 (98.8) | 0.909   |
|                          | True     |         | 315 (1.2)    | 138 (1.2)    | 177 (1.2)    |         |
| Prior_Valvular, n (%)    | False    | 0       | 26203 (98.2) | 11387 (98.5) | 14816 (98.0) | 0.004   |
|                          | True     |         | 482 (1.8)    | 177 (1.5)    | 305 (2.0)    |         |
| Prior_PHTN, n (%)        | False    | 0       | 26505 (99.3) | 11487 (99.3) | 15018 (99.3) | 0.939   |
|                          | True     |         | 180 (0.7)    | 77 (0.7)     | 103 (0.7)    |         |
| Prior_PVD, n (%)         | False    | 0       | 26239 (98.3) | 11402 (98.6) | 14837 (98.1) | 0.003   |
|                          | True     |         | 446 (1.7)    | 162 (1.4)    | 284 (1.9)    |         |
| Prior_HTN, n (%)         | False    | 0       | 22435 (84.1) | 9906 (85.7)  | 12529 (82.9) | <0.001  |
|                          | True     |         | 4250 (15.9)  | 1658 (14.3)  | 2592 (17.1)  |         |
| Prior_Paralysis, n (%)   | False    | 0       | 26573 (99.6) | 11515 (99.6) | 15058 (99.6) | 0.995   |
|                          | True     |         | 112 (0.4)    | 49 (0.4)     | 63 (0.4)     |         |
| Prior_NeuroOther, n (%)  | False    | 0       | 24501 (91.8) | 10629 (91.9) | 13872 (91.7) | 0.622   |
|                          | True     |         | 2184 (8.2)   | 935 (8.1)    | 1249 (8.3)   |         |
| Prior_Pulmonary, n (%)   | False    | 0       | 22288 (83.5) | 9858 (85.2)  | 12430 (82.2) | <0.001  |
|                          | True     |         | 4397 (16.5)  | 1706 (14.8)  | 2691 (17.8)  |         |
| Prior_DM, n (%)          | False    | 0       | 25546 (95.7) | 11110 (96.1) | 14436 (95.5) | 0.017   |
|                          | True     |         | 1139 (4.3)   | 454 (3.9)    | 685 (4.5)    |         |
| Prior_DMcx, n (%)        | False    | 0       | 25935 (97.2) | 11258 (97.4) | 14677 (97.1) | 0.166   |
|                          | True     |         | 750 (2.8)    | 306 (2.6)    | 444 (2.9)    |         |
| Prior_Hypothyroid, n (%) | False    | 0       | 25772 (96.6) | 11231 (97.1) | 14541 (96.2) | <0.001  |
|                          | True     |         | 913 (3.4)    | 333 (2.9)    | 580 (3.8)    |         |
| Prior_Renal, n (%)       | False    | 0       | 26471 (99.2) | 11479 (99.3) | 14992 (99.1) | 0.316   |
|                          | True     |         | 214 (0.8)    | 85 (0.7)     | 129 (0.9)    |         |
| Prior_Liver, n (%)       | False    | 0       | 24380 (91.4) | 10637 (92.0) | 13743 (90.9) | 0.002   |
|                          | True     |         | 2305 (8.6)   | 927 (8.0)    | 1378 (9.1)   |         |
| Prior_PUD, n (%)         | False    | 0       | 26502 (99.3) | 11493 (99.4) | 15009 (99.3) | 0.243   |
|                          | True     |         | 183 (0.7)    | 71 (0.6)     | 112 (0.7)    |         |
| Prior_HIV, n (%)         | False    | 0       | 26570 (99.6) | 11523 (99.6) | 15047 (99.5) | 0.116   |
|                          | True     |         | 115 (0.4)    | 41 (0.4)     | 74 (0.5)     |         |
| Prior_Lymphoma, n (%)    | False    | 0       | 26656 (99.9) | 11553 (99.9) | 15103 (99.9) | 0.689   |
|                          | True     |         | 29 (0.1)     | 11 (0.1)     | 18 (0.1)     |         |
| Prior_Mets, n (%)        | False    | 0       | 26636 (99.8) | 11539 (99.8) | 15097 (99.8) | 0.346   |
|                          | True     |         | 49 (0.2)     | 25 (0.2)     | 24 (0.2)     |         |

|                               |              |     |              |              |              |        |
|-------------------------------|--------------|-----|--------------|--------------|--------------|--------|
| Prior_Tumor, n (%)            | False        | 0   | 26437 (99.1) | 11463 (99.1) | 14974 (99.0) | 0.442  |
|                               | True         |     | 248 (0.9)    | 101 (0.9)    | 147 (1.0)    |        |
| Prior_Rheumatic, n (%)        | False        | 0   | 25925 (97.2) | 11247 (97.3) | 14678 (97.1) | 0.379  |
|                               | True         |     | 760 (2.8)    | 317 (2.7)    | 443 (2.9)    |        |
| Prior_Coagulopathy, n (%)     | False        | 0   | 26325 (98.7) | 11424 (98.8) | 14901 (98.5) | 0.097  |
|                               | True         |     | 360 (1.3)    | 140 (1.2)    | 220 (1.5)    |        |
| Prior_Obesity, n (%)          | False        | 0   | 24766 (92.8) | 10855 (93.9) | 13911 (92.0) | <0.001 |
|                               | True         |     | 1919 (7.2)   | 709 (6.1)    | 1210 (8.0)   |        |
| Prior_WeightLoss, n (%)       | False        | 0   | 25934 (97.2) | 11250 (97.3) | 14684 (97.1) | 0.414  |
|                               | True         |     | 751 (2.8)    | 314 (2.7)    | 437 (2.9)    |        |
| Prior_FluidsLytes, n (%)      | False        | 0   | 24875 (93.2) | 10720 (92.7) | 14155 (93.6) | 0.004  |
|                               | True         |     | 1810 (6.8)   | 844 (7.3)    | 966 (6.4)    |        |
| Prior_BloodLoss, n (%)        | False        | 0   | 26457 (99.1) | 11464 (99.1) | 14993 (99.2) | 0.926  |
|                               | True         |     | 228 (0.9)    | 100 (0.9)    | 128 (0.8)    |        |
| Prior_Anemia, n (%)           | False        | 0   | 25577 (95.8) | 11112 (96.1) | 14465 (95.7) | 0.087  |
|                               | True         |     | 1108 (4.2)   | 452 (3.9)    | 656 (4.3)    |        |
| Prior_Alcohol, n (%)          | False        | 0   | 24785 (92.9) | 10640 (92.0) | 14145 (93.5) | <0.001 |
|                               | True         |     | 1900 (7.1)   | 924 (8.0)    | 976 (6.5)    |        |
| Prior_Drugs, n (%)            | False        | 0   | 32 (0.1)     | 10 (0.1)     | 22 (0.1)     | 0.229  |
|                               | True         |     | 26653 (99.9) | 11554 (99.9) | 15099 (99.9) |        |
| Prior_Psychoses, n (%)        | False        | 0   | 23631 (88.6) | 10228 (88.4) | 13403 (88.6) | 0.640  |
|                               | True         |     | 3054 (11.4)  | 1336 (11.6)  | 1718 (11.4)  |        |
| Prior_Depression, n (%)       | False        | 0   | 20774 (77.8) | 9022 (78.0)  | 11752 (77.7) | 0.571  |
|                               | True         |     | 5911 (22.2)  | 2542 (22.0)  | 3369 (22.3)  |        |
| income_cat, n (%)             | high         | 373 | 4017 (15.3)  | 1754 (15.4)  | 2263 (15.2)  | <0.001 |
|                               | low          |     | 4353 (16.5)  | 2022 (17.7)  | 2331 (15.6)  |        |
|                               | mid          |     | 17942 (68.2) | 7630 (66.9)  | 10312 (69.2) |        |
| no_school, mean (SD)          |              | 277 | 0.0 (0.0)    | 0.0 (0.0)    | 0.0 (0.0)    | 0.817  |
| elementary_school, mean (SD)  |              | 277 | 0.0 (0.0)    | 0.0 (0.0)    | 0.0 (0.0)    | 0.422  |
| middle_school, mean (SD)      |              | 277 | 0.0 (0.0)    | 0.0 (0.0)    | 0.0 (0.0)    | 0.108  |
| high_school, mean (SD)        |              | 277 | 0.1 (0.0)    | 0.1 (0.0)    | 0.1 (0.0)    | 0.050  |
| post_secondary_edu, mean (SD) |              | 277 | 0.8 (0.1)    | 0.8 (0.1)    | 0.8 (0.1)    | <0.001 |
| post_baccalaureate, mean (SD) |              | 277 | 0.1 (0.1)    | 0.1 (0.1)    | 0.1 (0.0)    | 0.003  |
| employed, mean (SD)           |              | 264 | 0.5 (0.1)    | 0.5 (0.1)    | 0.5 (0.1)    | 0.336  |
| area_type, n (%)              | Metropolitan | 12  | 17894 (67.1) | 8035 (69.5)  | 9859 (65.2)  | <0.001 |
|                               | are          |     |              |              |              |        |
|                               | Micropolitan |     | 6374 (23.9)  | 2545 (22.0)  | 3829 (25.3)  |        |
|                               | area         |     |              |              |              |        |
| Rural areas                   |              |     | 584 (2.2)    | 234 (2.0)    | 350 (2.3)    |        |
| Small town                    |              |     | 1821 (6.8)   | 742 (6.4)    | 1079 (7.1)   |        |

|                           |         |   |              |              |              |        |
|---------------------------|---------|---|--------------|--------------|--------------|--------|
| window_mat, n (%)         | B       | 0 | 22543 (84.5) | 9470 (81.9)  | 13073 (86.5) | <0.001 |
|                           | BN      |   | 1681 (6.3)   | 926 (8.0)    | 755 (5.0)    |        |
|                           | M       |   | 309 (1.2)    | 126 (1.1)    | 183 (1.2)    |        |
|                           | N       |   | 2152 (8.1)   | 1042 (9.0)   | 1110 (7.3)   |        |
| ssri_rx_before_f11, n (%) | False   | 0 | 18099 (67.8) | 7920 (68.5)  | 10179 (67.3) | 0.044  |
|                           | True    |   | 8586 (32.2)  | 3644 (31.5)  | 4942 (32.7)  |        |
| ssri_rx_during_f11, n (%) | False   | 0 | 22177 (83.1) | 9733 (84.2)  | 12444 (82.3) | <0.001 |
|                           | True    |   | 4508 (16.9)  | 1831 (15.8)  | 2677 (17.7)  |        |
| bzd_rx_before_f11, n (%)  | False   | 0 | 24725 (92.7) | 10752 (93.0) | 13973 (92.4) | 0.081  |
|                           | True    |   | 1960 (7.3)   | 812 (7.0)    | 1148 (7.6)   |        |
| bzd_rx_during_f11, n (%)  | False   | 0 | 26231 (98.3) | 11341 (98.1) | 14890 (98.5) | 0.014  |
|                           | True    |   | 454 (1.7)    | 223 (1.9)    | 231 (1.5)    |        |
| od_before_f11, n (%)      | False   | 0 | 25240 (94.6) | 10839 (93.7) | 14401 (95.2) | <0.001 |
|                           | True    |   | 1445 (5.4)   | 725 (6.3)    | 720 (4.8)    |        |
| opd_rx_before_f11, n (%)  | False   | 0 | 16885 (63.3) | 7185 (62.1)  | 9700 (64.1)  | 0.001  |
|                           | True    |   | 9800 (36.7)  | 4379 (37.9)  | 5421 (35.9)  |        |
| opd_rx_during_f11, n (%)  | False   | 0 | 25236 (94.6) | 10730 (92.8) | 14506 (95.9) | <0.001 |
|                           | True    |   | 1449 (5.4)   | 834 (7.2)    | 615 (4.1)    |        |
| od_window_0, n (%)        | False   | 0 | 26087 (97.8) | 11204 (96.9) | 14883 (98.4) | <0.001 |
|                           | True    |   | 598 (2.2)    | 360 (3.1)    | 238 (1.6)    |        |
| state, n (%)              | State B | 0 | 22315 (83.6) | 9565 (82.7)  | 12750 (84.3) | <0.001 |
|                           | State A |   | 4370 (16.4)  | 1999 (17.3)  | 2371 (15.7)  |        |
| od_after_3m, n (%)        | False   | 0 | 25132 (94.2) | 10662 (92.2) | 14470 (95.7) | <0.001 |
|                           | True    |   | 1553 (5.8)   | 902 (7.8)    | 651 (4.3)    |        |
| od_after_F11, n (%)       | False   | 0 | 24684 (92.5) | 10393 (89.9) | 14291 (94.5) | <0.001 |
|                           | True    |   | 2001 (7.5)   | 1171 (10.1)  | 830 (5.5)    |        |
| top_pdc_3m, mean (SD)     |         | 0 | 0.7 (0.3)    | 0.4 (0.2)    | 1.0 (0.1)    | <0.001 |
