# Supplementary material for: Using machine learning to study the effect of medication adherence in Opioid Use Disorder
Source: PubMed Central journal article supplement (PMC9754174; doi:10.1371/journal.pone.0278988), 2022-12-15
Supplement: pone.0278988.s003.pdf [file pone.0278988.s003.pdf]

### S3 Appendix: Hyperparameters used in the models

| Model               | Parameters                                                                                                                                                                                                                                                                        |
|---------------------|-----------------------------------------------------------------------------------------------------------------------------------------------------------------------------------------------------------------------------------------------------------------------------------|
| Logistic Regression | $C = 1.0$                                                                                                                                                                                                                                                                         |
| Decision Tree       | $\text{criterion}=\text{gini}, \quad \text{min\_samples\_split} = 2,$<br>$\text{min\_samples\_leaf} = 1$                                                                                                                                                                          |
| Random Forest       | $\text{n\_estimators}=200,$ $\text{criterion}=\text{gini},$<br>$\text{max\_depth}=10,$ $\text{random\_state}=0,$<br>$\text{max\_features}=\text{None}$                                                                                                                            |
| XGB                 | $\text{learning\_rate}=0.01,$ $\text{n\_estimators}=1000,$<br>$\text{max\_depth}=6, \quad \text{gamma}=10, \quad \text{subsample} =$<br>$0.8, \text{colsample\_bytree} = 0.4, \text{scale\_pos\_weight}=1,$<br>$\text{objective}=\text{binary:logistic}, \text{reg\_alpha} = 0.3$ |
